# Supplementary material for: Only 32.3% of Breast Cancer Families with Pathogenic Variants in Cancer Genes Utilized Cascade Genetic Testing
Source: MDPI journal article supplement (doi:10.3390/cancers15215218), 2023-10-30
Supplement: s1 [file s1]

**Table S1. 52-genes included in this study.**

| Gene                      | Reference sequence   |
|---------------------------|----------------------|
| APC                       | NM_000038            |
| ATM                       | NM_000051            |
| ATR                       | NM_001184            |
| AXIN2                     | NM_004655            |
| BAP1                      | NM_004656            |
| BARD1                     | NM_000465            |
| BLM                       | NM_000057            |
| BMPR1A                    | NM_004329            |
| BRCA1*                    | NM_007294            |
| BRCA2*                    | NM_000059            |
| BRIP1 *                   | NM_032043            |
| CDH1                      | NM_004360            |
| CDK4                      | NM_000075            |
| CDKN2A (p14ARF, p16INK4a) | NM_000077, NM_058195 |
| CHEK2*                    | NM_007194            |
| EPCAM*                    | NM_002354            |
| FAM175A                   | NM_139076            |
| FANCA                     | NM_000135            |
| FANCL                     | NM_001114636         |
| FANCM                     | NM_020937            |
| GALNT12                   | NM_024642            |
| GEN1                      | NM_001130009         |
| HOXB13:c.251G>A p.(G84E)  | NM_006361            |
| MEN1                      | NM_000244            |
| MITF                      | NM_001354604         |
| MLH1*                     | NM_000249            |
| MRE11                     | NM_005591            |
| MSH2*                     | NM_000251            |
| MSH3                      | NM_002439            |
| MSH6*                     | NM_000179            |
| MUTYH*                    | NM_001128425         |
| NBN                       | NM_002485            |
| NF1                       | NM_000267            |
| NTHL1                     | NM_002528            |
| PALB2*                    | NM_024675            |
| PMS2                      | NM_000535            |
| POLD1 (Exons 8-13)        | NM_001256849         |
| POLE (Exons 1-14)         | NM_006231            |
| PPP2R2A                   | NM_002717            |
| PTEN                      | NM_000314            |
| RAD50*                    | NM_005732            |
| RAD51B                    | NM_133509            |
| RAD51C*                   | NM_058216            |
| RAD51D*                   | NM_002878            |
| RET                       | NM_020975            |
| RNF43                     | NM_017763            |
| RPS20                     | NM_001023            |
| SMAD4                     | NM_005359            |
| SMARCA4                   | NM_001128849         |
| STK11                     | NM_000455            |
| TP53*                     | NM_000546            |
| VHL                       | NM_000551            |

\*Copy number variation analysis was performed on the following genes:

BRCA1, BRCA2, CHEK2, EPCAM (Exons 8, 9), MLH1, MSH2, MSH6, MUTYH, PALB2, RAD50 (Exons 1, 2, 4, 10, 14, 21, 23 and 25), RAD51C, RAD51D, and TP53.

**Table S2. Breast cancer associated genes and risk category.**

| Gene           | Risk category (Absolute risk) | Risk evidence                                                                                            |
|----------------|-------------------------------|----------------------------------------------------------------------------------------------------------|
| <i>ATM</i>     | Moderate (20%–30%)            | NCCN Guidelines®, Genetic/Familial High-Risk Assessment: Breast, Ovarian, and Pancreatic, Version 1.2024 |
| <i>BARD1</i>   | Moderate (17%–30%)            | NCCN Guidelines®, Genetic/Familial High-Risk Assessment: Breast, Ovarian, and Pancreatic, Version 1.2024 |
| <i>BLM</i>     | Unspecified                   | PMID: 31614901, 20301572                                                                                 |
| <i>BRCA1</i>   | High (>60%)                   | NCCN Guidelines®, Genetic/Familial High-Risk Assessment: Breast, Ovarian, and Pancreatic, Version 1.2024 |
| <i>BRCA2</i>   | High (>60%)                   | NCCN Guidelines®, Genetic/Familial High-Risk Assessment: Breast, Ovarian, and Pancreatic, Version 1.2024 |
| <i>BRIP1</i>   | Unspecified                   | NCCN Guidelines®, Genetic/Familial High-Risk Assessment: Breast, Ovarian, and Pancreatic, Version 1.2024 |
| <i>CDH1</i>    | High (41%–60%)                | NCCN Guidelines®, Genetic/Familial High-Risk Assessment: Breast, Ovarian, and Pancreatic, Version 1.2024 |
| <i>CHEK2</i>   | Moderate (20%–40%)            | NCCN Guidelines®, Genetic/Familial High-Risk Assessment: Breast, Ovarian, and Pancreatic, Version 1.2024 |
| <i>EPCAM</i>   | Low (<15%)                    | NCCN Guidelines®, Genetic/Familial High-Risk Assessment: Breast, Ovarian, and Pancreatic, Version 1.2024 |
| <i>FAM175A</i> | Uncertain                     | PMID: 35353237, 22357538                                                                                 |
| <i>FANCA</i>   | Uncertain                     | PMID:32235514                                                                                            |
| <i>FANCL</i>   | Uncertain                     | PMID:32235514                                                                                            |
| <i>FANCM</i>   | Uncertain                     | PMID:32235514                                                                                            |
| <i>MLH1</i>    | Low (<15%)                    | NCCN Guidelines®, Genetic/Familial High-Risk Assessment: Breast, Ovarian, and Pancreatic, Version 1.2024 |
| <i>MRE11</i>   | Unspecified                   | PMID: 23586058                                                                                           |
| <i>MSH2</i>    | Low (<15%)                    | NCCN Guidelines®, Genetic/Familial High-Risk Assessment: Breast, Ovarian, and Pancreatic, Version 1.2024 |
| <i>MSH6</i>    | Low (<15%)                    | NCCN Guidelines®, Genetic/Familial High-Risk Assessment: Breast, Ovarian, and Pancreatic, Version 1.2024 |
| <i>NBN</i>     | Unspecified                   | PMID: 33471991                                                                                           |
| <i>NF1</i>     | Moderate (20%–40%)            | NCCN Guidelines®, Genetic/Familial High-Risk Assessment: Breast, Ovarian, and Pancreatic, Version 1.2024 |
| <i>NTHL1</i>   | Unspecified                   | NCCN Guidelines®, Genetic/Familial High-Risk Assessment: Colorectal, Version 1.2023                      |
| <i>PALB2</i>   | High (41%–60%)                | NCCN Guidelines®, Genetic/Familial High-Risk Assessment: Breast, Ovarian, and Pancreatic, Version 1.2024 |
| <i>PMS2</i>    | Low (<15%)                    | NCCN Guidelines®, Genetic/Familial High-Risk Assessment: Breast, Ovarian, and Pancreatic, Version 1.2024 |
| <i>PTEN</i>    | High (40%–60%)                | NCCN Guidelines®, Genetic/Familial High-Risk Assessment: Breast, Ovarian, and Pancreatic, Version 1.2024 |
| <i>RAD50</i>   | Unspecified                   | PMID: 21356067                                                                                           |
| <i>RAD51C</i>  | Moderate (17%–30%)            | NCCN Guidelines®, Genetic/Familial High-Risk Assessment: Breast, Ovarian, and Pancreatic, Version 1.2024 |
| <i>RAD51D</i>  | Moderate (17%–30%)            | NCCN Guidelines®, Genetic/Familial High-Risk Assessment: Breast, Ovarian, and Pancreatic, Version 1.2024 |
| <i>SMARCA4</i> | Unspecified                   | PMID: 21356067                                                                                           |
| <i>STK11</i>   | High (32%–54%)                | NCCN Guidelines®, Genetic/Familial High-Risk Assessment: Breast, Ovarian, and Pancreatic, Version 1.2024 |
| <i>TP53</i>    | High (>60%)                   | NCCN Guidelines®, Genetic/Familial High-Risk Assessment: Breast, Ovarian, and Pancreatic, Version 1.2024 |
